# Supplementary material
Source: publisher site journal article supplement (https://www.spandidos-publications.com/296/downloadSupplementary)

Figure S1. miR-382-5p did not change the proliferation of CAFs. miR-382-5p mimics or negative control miRNA were transfected in CAFs and the cell proliferation of CAFs were measured. miR-382-5p mimic transfection did not alter the proliferation of CAFs, indicating that miR-382-5p may not be a regulator of CAF cell proliferation and therefore is not correlated with CAF density. CAFs, cancer-associated fibroblasts.

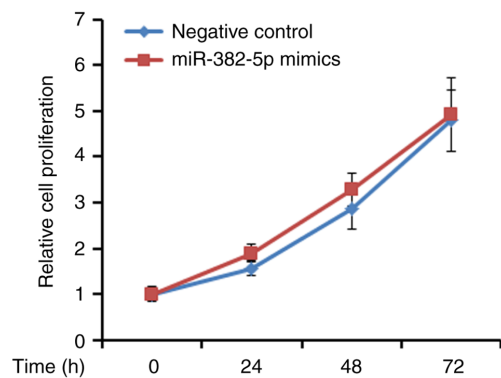

Supplement: Supplementary file 1 [file downloadSupplementary]
